# Supplementary material for: Droplet impacts onto soft solids entrap more air
Source: Royal Society of Chemistry journal article supplement (doi:10.1039/d0sm00713g), 2020-01-01
Supplement: d0sm00713g10.pdf [file d0sm00713g10.pdf]

## Droplet impacts onto soft solids entrap more air

Kenneth R. Langley, Alfonso A. Castrejón-Pita, and Sigurdur T. Thoroddsen

### Supplemental Movie Captions

Movie 1 – Corresponds with Figure 2(a) in the main text. Bottom view of an ethanol drop impact onto a rigid, glass microscope slide ( $V = 1.99$  m/s,  $R_b = 1.5$  mm,  $We = 207$ ). Filmed at 5 Mfps, played back at 24 fps.

Movie 2 – Corresponds with Figure 2(b) in the main text. Bottom view of an ethanol drop impact onto a soft silicone surface ( $E = 15$  kPa,  $V = 1.91$  m/s,  $R_b = 1.4$  mm,  $We = 187$ ). Filmed at 5 Mfps, played back at 24 fps.

Movie 3 – Corresponds with Figure 5(a) in the main text. Bottom view of a DI water drop impact onto a soft silicone surface ( $E = 15$  kPa,  $V = 0.7$  m/s,  $R_b = 2.7$  mm,  $We_e = 4.4$ ). Filmed at 200 kfps, played back at 24 fps.

Movie 4 – Corresponds with Figure 5(b) in the main text. Bottom view of a DI water drop impact onto a soft silicone surface ( $E = 15$  kPa,  $V = 1.1$  m/s,  $R_b = 2.6$  mm,  $We_e = 10$ ). Filmed at 200 kfps, played back at 24 fps.

Movie 5 – Corresponds with Figure 5(c) in the main text. Bottom view of a DI water drop impact onto a soft silicone surface ( $E = 15$  kPa,  $V = 1.5$  m/s,  $R_b = 2.7$  mm,  $We_e = 21$ ). Filmed at 200 kfps, played back at 24 fps.

Movie 6 – Corresponds with Figure 5(d) in the main text. Bottom view of a DI water drop impact onto a soft silicone surface that is only 1 mm thick ( $E = 15$  kPa,  $V = 1.1$  m/s,  $R_b = 5.1$  mm,  $We_e = 21$ ). Filmed at 1 Mfps, played back at 24 fps.

Movie 7 – Corresponds with Figure 5(e) in the main text. Bottom view of a DI water drop impact onto a soft silicone surface ( $E = 330$  kPa,  $V = 1.1$  m/s,  $R_b = 7.7$  mm,  $We_e = 29$ ). Filmed at 1 Mfps, played back at 24 fps.

Movie 8 – Corresponds with Figure 5(f) in the main text. Bottom view of a DI water drop impact onto a soft silicone surface ( $E = 460$  kPa,  $V = 1.1$  m/s,  $R_b = 3.4$  mm,  $We_e = 13$ ). Filmed at 1 Mfps, played back at 24 fps.

Movie 9 – Corresponds with Figure 7 in the main text. Bottom view of an ethanol drop impact onto a soft silicone surface ( $E = 330$  kPa,  $V = 1.1$  m/s,  $R_b = 1.54$  mm,  $We_e = 37$ ) using transmission interferometry. Filmed at 1 Mfps, played back at 24 fps.
